# Supplementary material
Source: HighWire-hosted journal article supplement (https://bmjopen.bmj.com/content/14/12/e082344)
Supplement: inline-supplementary-material-1 [file inline-supplementary-material-1.pdf]

Supplementary Table 1: Criteria for Quantitative Evaluation of Response

|                | Question                                                       | Standard                                                                                                                                                                                                                                                                                                                                  | Example                                                                                                                                                                                                                                                                                                                                                                                                                                                                                                                                                                                      |
|----------------|----------------------------------------------------------------|-------------------------------------------------------------------------------------------------------------------------------------------------------------------------------------------------------------------------------------------------------------------------------------------------------------------------------------------|----------------------------------------------------------------------------------------------------------------------------------------------------------------------------------------------------------------------------------------------------------------------------------------------------------------------------------------------------------------------------------------------------------------------------------------------------------------------------------------------------------------------------------------------------------------------------------------------|
| completeness   | What are the indications for total joint replacement surgery ? | <ul style="list-style-type: none"><li>• Mentions all major indications</li><li>• Explains the necessity for surgery</li><li>• Includes diagnostic and assessment details</li><li>• Considers additional factors</li></ul>                                                                                                                 | The indications for total joint replacement surgery include severe osteoarthritis, rheumatoid arthritis, and post-traumatic joint damage. Surgery is typically considered when patients experience significant pain and functional impairment that does not respond to conservative treatments like physical therapy or medications. Diagnosis is confirmed through clinical evaluation and imaging studies, such as X-rays or MRI, showing joint degeneration. Preoperative assessment considers factors like patient age, activity level, and overall health to ensure the best outcomes.” |
| incompleteness |                                                                | <ul style="list-style-type: none"><li>• Fails to mention some or all major indications</li><li>• Does not explain surgical indications</li><li>• Does not cover diagnostic or preoperative evaluation</li><li>• Lacks individualized considerations</li></ul>                                                                             | Total joint replacement is usually performed for conditions like osteoarthritis. Patients get surgery when the pain is too much.                                                                                                                                                                                                                                                                                                                                                                                                                                                             |
| accuracy       |                                                                | <ul style="list-style-type: none"><li>• Mentions all major indications</li><li>• Explains the necessity for surgery</li><li>• Includes diagnostic and assessment details</li><li>• Considers additional factors</li></ul>                                                                                                                 | Total joint replacement surgery is typically indicated for severe osteoarthritis, rheumatoid arthritis, and post-traumatic joint damage when patients experience significant pain and loss of function. Conservative treatments like physical therapy and medications should be attempted first. Diagnostic confirmation is done through X-rays or MRI showing advanced joint degeneration. The decision for surgery also takes into account the patient’s overall health, activity level, and age.                                                                                          |
| inaccuracy     |                                                                | <ul style="list-style-type: none"><li>• Fails to mention some or all major indications.</li><li>• Does not explain surgical indications: missing pain, functional impairment, or conservative treatment failure.</li><li>• Does not cover diagnostic or preoperative evaluation.</li><li>• Lacks individualized considerations.</li></ul> | Total joint replacement can be done for mild arthritis or general joint pain, even if conservative treatments haven’t been tried. CT scans are the preferred diagnostic tool for confirming the need for surgery, and patient factors like age or health status are not usually important in the decision.                                                                                                                                                                                                                                                                                   |
